1 **Classification:**

2 **BIOLOGICAL SCIENCES: Genetics**

3

4 **Title: Origins, admixture dynamics and homogenization of the African gene pool**  
5 **in the Americas**

6

7 Mateus H. Gouveia<sup>1,2,3,†</sup>, Victor Borda<sup>1,†</sup>, Thiago P. Leal<sup>1,4,†</sup>, Rennan G. Moreira<sup>1,5</sup>,  
8 Andrew W. Bergen<sup>6</sup>, Marla M. Aquino<sup>1</sup>, Gilderlanio S. Araujo<sup>1,7</sup>, Nathalia M. Araujo<sup>1</sup>,  
9 Fernanda S.G. Kehdy<sup>1,8</sup>, Raquel Liboredo<sup>1</sup>, Moara Machado<sup>1,9</sup>, Wagner C.S.  
10 Magalhaes<sup>1,10</sup>, Lucas A. Michelin<sup>1</sup>, Maíra R. Rodrigues<sup>1,11</sup>, Fernanda Rodrigues-Soares<sup>1</sup>,  
11 Hanaisa P. Sant Anna<sup>1,12</sup>, Meddly L. Santolalla<sup>1</sup>, Marília O. Scliar<sup>1,13</sup>, Giordano Soares-  
12 Souza<sup>1</sup>, Roxana Zamudio<sup>1</sup>, Camila Zolini<sup>1,14,15</sup>, Michael Dean<sup>16</sup>, Robert H. Gilman<sup>17,18</sup>,  
13 Heinner Guio<sup>19</sup>, Jorge Rocha<sup>20,21</sup>, Alexandre C. Pereira<sup>22</sup>, Mauricio L. Barreto<sup>23,24</sup>,  
14 Bernardo L. Horta<sup>25</sup>, Maria F. Lima-Costa<sup>2</sup>, Sam M. Mbulaiteye<sup>6</sup>, Stephen J. Chanock<sup>6</sup>,  
15 Sarah A. Tishkoff<sup>26</sup>, Meredith Yeager<sup>16,‡</sup>, Eduardo Tarazona-Santos<sup>1,14,27\*,‡</sup>

16

17 **Affiliations:**

18 <sup>1</sup>Departamento de Genética, Ecologia e Evolução, Instituto de Ciências Biológicas,  
19 Universidade Federal de Minas Gerais, Belo Horizonte, MG, 31270-901, Brazil.

20 <sup>2</sup>Instituto de Pesquisa Rene Rachou, Fundação Oswaldo Cruz, Belo Horizonte, MG,  
21 30190-002, Brazil.

22 <sup>3</sup>Center for Research on Genomics and Global Health, National Human Genome  
23 Research Institute, Bethesda, MD, 20892, United States.

24 <sup>4</sup>Departamento de Estatística, Universidade Federal de Minas Gerais, Belo Horizonte,  
25 MG, 31270-901, Brazil.

26 <sup>5</sup>Centro de Laboratórios Multiusuário (CELAM), Laboratório de Genômica, ICB,  
27 UFMG, Belo Horizonte, MG, 31270-901, Brazil;

28 <sup>6</sup>Division of Cancer Epidemiology and Genetics, National Cancer Institute (NCI),  
29 National Institutes of Health (NIH), Bethesda, MD, 20892, USA.

30 <sup>7</sup>Laboratório de Genética Humana e Médica, Instituto de Ciências Biológicas,  
31 Universidade Federal do Pará - Campus Guamá, Belém, PA, Brazil, 66075-110, Brazil.

32 <sup>8</sup>Laboratório de Hanseníase, Instituto Oswaldo Cruz, Fundação Oswaldo Cruz, Rio de  
33 Janeiro, RJ, 21040-900, Brazil.

34 <sup>9</sup>Division of Cancer Epidemiology and Genetics, National Cancer Institute, Bethesda,  
35 Maryland 20892, USA.

36 <sup>10</sup> Núcleo de Ensino e Pesquisas do Instituto Mário Penna - NEP-IMP. Bairro  
37 Luxemburgo, Belo Horizonte, MG, 30180-490, Brazil.

38 <sup>11</sup> Department of Genetics and Evolutionary Biology, Biosciences Institute, University  
39 of São Paulo, SP, 05508-090, Brazil.

40 <sup>12</sup>Melbourne Integrative Genomics, The University of Melbourne, Melbourne, VIC  
41 3052, Australia.

42 <sup>13</sup>Human Genome and Stem Cell Research Center, Biosciences Institute, University of  
43 São Paulo, 05508-090, SP, Brazil.

44 <sup>14</sup>Beagle, Belo Horizonte, MG, 31270-901, Brazil.

45 <sup>15</sup> Mosaico Translational Genomics Initiative, Universidade Federal de Minas Gerais,  
46 Belo Horizonte, MG, 31270-901, Brazil.

47 <sup>16</sup>Cancer Genomics Research Laboratory, Frederick National Laboratory for Cancer  
48 Research, Frederick, MD 21702, USA.

49 <sup>17</sup>Bloomberg School of Public Health, Johns Hopkins University, Baltimore, MD,  
50 21205, USA.

51 <sup>18</sup>Universidad Peruana Cayetano Heredia, Lima, Peru.

52 <sup>19</sup>Instituto Nacional de Salud, Lima, Perú.

53 <sup>20</sup>Departamento de Biologia, Faculdade de Ciências, Universidade do Porto, Porto,  
54 4169-007, Portugal.

55 <sup>21</sup>CIBIO/InBIO: Research Center in Biodiversity and Genetic Resources, Vairão, 4485-  
56 661, Portugal.

57 <sup>22</sup>Instituto do Coração, Universidade de São Paulo, São Paulo, SP, 05403-900, Brazil.

58 <sup>23</sup>Instituto de Saúde Coletiva, Universidade Federal da Bahia, Salvador, BA, 40110-040,  
59 Brazil.

60 <sup>24</sup>Center of Data and Knowledge Integration for Health (CIDACS), Fundação Oswaldo  
61 Cruz (FIOCRUZ), Salvador, Brazil;

62 <sup>25</sup>Programa de Pós-Graduação em Epidemiologia, Universidade Federal de Pelotas, 464,  
63 Pelotas, RS, 96001-970, Brazil.

64 <sup>26</sup>Department of Genetics and Department of Biology, University of Pennsylvania,  
65 Philadelphia, PA 19104, United States.

66 <sup>27</sup>Instituto de Estudos Avanzados Transdisciplinares, Universidade Federal de Minas  
67 Gerais, Belo Horizonte, MG, 31270-901, Brazil.

68

69 † These authors equally contributed as First Authors.

70 ‡ These authors equally contributed as Senior Authors.

71 **Corresponding Author:**

72 \* Eduardo Tarazona-Santos, Email: [edutars@icb.ufmg.br](mailto:edutars@icb.ufmg.br)

73 **Keywords:**

74 African diaspora, Transatlantic Slave Trade, admixture dynamics, *mestizaje*

75

76 **Abstract**

77 The Transatlantic Slave Trade transported more than 9 million Africans to the Americas  
78 between the early 16th and the mid-19th centuries. We performed genome-wide  
79 analysis of 6,267 individuals from 22 populations and observed an enrichment in West-  
80 African ancestry in northern latitudes of the Americas, whereas South/East African  
81 ancestry is more prevalent in southern South-America. This pattern results from distinct  
82 geographic and geopolitical factors leading to population differentiation. However, we  
83 observed a decrease of 68% in the African gene pool between-population diversity  
84 within the Americas when compared to the regions of origin from Africa, underscoring  
85 the importance of historical factors favoring admixture between individuals with  
86 different African origins in the New World. This is consistent with the excess of West-  
87 Central Africa ancestry (the most prevalent in the Americas) in the US and Southeast-  
88 Brazil, respect to historical-demography expectations. Also, in most of the Americas,  
89 admixture intensification occurred between 1,750 and 1,850, which correlates strongly  
90 with the peak of arrivals from Africa. This study contributes with a population genetics  
91 perspective to the ongoing social, cultural and political debate regarding ancestry, race,  
92 and admixture in the Americas.

93

94 **Significance Statement**

95 Differently from most genetic studies, that have estimated the overall African ancestry  
96 in the Americas, we perform a finer geographic analysis and infer how different African  
97 groups contributed to North-, South-American and Caribbean populations, in the  
98 context of geographic and geopolitical factors. We also perform a formal comparison of  
99 information from demographic history records of the Transatlantic Slave Trade with  
100 inferences based on genomic diversity of current populations. Our approach reveals the

101 distinct regional African ancestry roots of different populations from North-, South-  
102 America and the Caribe and other important aspects of the historical process of  
103 *mestizaje* and its dynamics in the American continent.

104

## 105 **Introduction**

106 The Transatlantic Slave Trade was an international enterprise involving Brazilian,  
107 British, Danish, Dutch, French, German, Portuguese, Spanish and Swedish traders.  
108 They brought over 9 million Africans to the Americas between the early 16<sup>th</sup> and the  
109 mid-19<sup>th</sup> centuries. African regions of origin included far away locations as Senegambia  
110 is from Tanzania. Destiny ports in the Americas were also distant as Newport in New  
111 England is from Buenos Aires (1, 2). The Transatlantic Slave Trade shaped the genetic  
112 structure of American continent populations (3–11). While most genetic studies have  
113 estimated the overall African ancestry in the Americas, a finer geographic analysis is  
114 needed to infer how different African groups contributed to North-, Central-, South-  
115 American and Caribbean populations. The geopolitical factors that permeated the  
116 African Diaspora have been seldom discussed at a continental scale, despite its potential  
117 influence on the genetic structure of populations. Furthermore, a formal comparison of  
118 information from demographic history records of the Transatlantic Slave Trade with  
119 inferences based on genomic diversity of current populations has not been performed.

120

121 Here we perform a joint analysis of genetic data and historical records of the  
122 Transatlantic Slave Trade to address the following questions: (i) Is there a  
123 correspondence between the geographic origin of specific African populations of the  
124 Diaspora and specific destinations in the Americas?; (ii) Was admixture dynamics in the  
125 Americas associated with the dynamics of arrivals of African slaves?; (iii) Considering

126 the geographic extension and the massive demographic magnitude of the African  
127 Diaspora, as well as the level of *between-populations* genetic differentiation in the  
128 African regions of origin of slaves, did the Transatlantic Slave Trade lead to a higher,  
129 similar or lower level of *between-population* differentiation of the African gene pool in  
130 the Americas?

131

## 132 **Results and Discussion**

133 We combined genome-wide data from 25 populations: 9 admixed of the Americas, 11  
134 Africans, 2 Europeans and 3 Native Americans (Fig. 1, *SI Appendix*, Table S1 and  
135 section 1.1) and created a dataset of 6,267 unrelated individuals with >10% of African  
136 ancestry (*SI Appendix*, sections 1 and 2). Using ADMIXTURE (12), we identified two  
137 continental (European and Native American) and four African-specific ancestry  
138 clusters, named based on their association with geographic regions (*SI Appendix*, Table  
139 S1, represented by different colors in Fig. 1): (i) West-Central African (blue), (ii)  
140 Western African (purple) and, (iii) South/East African (yellow), which are prevalent in  
141 the Americas, as well as (iv) Northern Ugandan (NU, cyan), which accounts for a very  
142 low proportion of African ancestry in the Americas. Hereafter, while in African  
143 individuals, the proportion of ADMIXTURE ancestry clusters are relative to their whole  
144 genome ancestry (Fig. 1A, *SI Appendix*, Table S1), in American continent individuals,  
145 these proportions are relative to the sum of the four African ancestry clusters (Fig 1A).  
146 We also estimated haplotype-based population admixture proportions (13, 14) in  
147 populations of the Americas, that in Fig. 2A and B, and *SI Appendix*, Table S3, are  
148 relative to the total contribution of African populations.

149

150 *Ancestry correspondence between African and admixed American continent*  
151 *populations, and the influence of geography and geopolitics*

152 The West-Central Africa-associated ancestry cluster is the most prevalent African  
153 cluster in the Americas, including African-Caribbean from Barbados (72% of African  
154 ancestry), Northeastern Brazilians (57%), Afro-Peruvians (56%) and US African-  
155 Americans (54-55%) (blue in Fig. 1, *SI Appendix*, Table S1 and section 2.1). Moreover,  
156 haplotype-based analysis(13, 14) reveals a higher contribution from Yoruba-like and  
157 Esan-like populations (from Nigeria, mean: 38%) than from Kwa/Gur-like populations  
158 (from Ghana, mean: 18%) (Fig. 2A and B, *SI Appendix*, Table S3).

159 The Western Africa-associated ancestry cluster has its highest proportions in Puerto  
160 Ricans (38% of African ancestry), Colombians (27%) and US African-Americans (19-  
161 20%, purple in Fig. 1, *SI Appendix*, Table S1), while Brazilians have the lowest  
162 proportion (<9%), limited to a Mandinka-like (Gambia) contribution and with no  
163 Mende-like (Sierra Leone) contribution (Fig. 2A and B, *SI Appendix*, Table S3).

164 The South/East Africa-associated ancestry cluster, in contrast, shows its highest  
165 proportion in South and Southeast Brazil (44% and 54% of total African ancestry,  
166 respectively) (yellow in Fig. 1 and *SI Appendix*, Table S1). Haplotype-based methods  
167 (13, 14) identified two different sources of gene flow associated with the South/Eastern  
168 Africa ancestry cluster: one from Mbukushu-like populations (Botswana, Western  
169 Bantu speakers from Southern Africa, 20-24% to South/Southeast Brazil) and one from  
170 Luhya-like populations (Kenya, Eastern Bantu speakers from Eastern Africa, 17-20% to  
171 South/Southeast Brazil, Fig. 2A and B, *SI Appendix*, Table S3). Western- and Eastern-  
172 Bantu speakers historically correspond to the two streams of the Bantu migrations in the  
173 last 4000-2500 years (10, 15, 16).



174 This emerging portrait of the African ancestry in the Americas suggests an influence of  
175 geography and geopolitics. Geographical factors include: (i) the latitudinal proximity  
176 between Western Africa and Caribe-Central/North America, as well as between  
177 South/East Africa and Southern Brazil, (ii) the winds and ocean currents, that shaped  
178 two navigation systems: the North-Atlantic, with voyages mostly to North America, and  
179 the South-Atlantic, with voyages predominantly to Brazil (17). Indeed, West Central  
180 Africa- and West Africa-associated ancestry clusters are more commonly observed in  
181 northern latitudes, while the South/East Africa-associated ancestry cluster is more  
182 evident in southern latitudes.

183 Differently, the Portugal possessions in the Americas (Brazil) and its influence in South  
184 and East African coasts (current Angola and Mozambique)(18) exemplify the  
185 geopolitical factors that affected, in particular, the distribution of the South/East Africa-  
186 associated ancestry cluster. While the Portuguese Crown had earlier privileged relations  
187 with the kingdoms of Benin in nowadays Nigeria, it later extended its influence to  
188 Bantu-speaking areas such as Congo/Angola and Mozambique (19). Indeed,  
189 Portuguese-Brazilian slave trade routes departed from Luanda and Cabinda (Angola)  
190 and from Zanzibar (Tanzania) and Inhambane (Mozambique) during 18<sup>th</sup> and 19<sup>th</sup>  
191 centuries (1). The abolition of slavery by the British in 1807, who controlled the North  
192 Atlantic route, also led Portuguese traders to prefer routes in the South Atlantic(20).  
193 Therefore, geography (inter-continental distances and climatic factors affecting  
194 transatlantic navigation) and geopolitics (European colonial influences and possessions)  
195 influenced the geographic and linguistic diversity of African emigrants as well as  
196 favored the regional differentiation of African ancestry in the Americas.

197

198 ***The dynamics of African admixture in the Americas accompanied the dynamics of***  
199 ***arrivals of African slaves***

200 Remarkably, linkage-disequilibrium-based inference (14) shows that all the studied  
201 admixed populations of the Americas exhibit the signature of an intensification of  
202 admixture in the interval from 1750 to 1850 (Fig. 2C, *SI Appendix*, section 3), revealing  
203 a continental trend. This trend is consistent with results by Baharian et al. (3), focused  
204 in the US. Importantly, this time interval matches or is immediately subsequent to  
205 regional peaks of number of slaves arriving from Africa to US, Barbados, Puerto Rico  
206 and Brazil (*SI Appendix*, Fig. S4). Thus, in most of the Americas, the arrival of the  
207 largest contingent of Africans between 1700 and 1850 (*SI Appendix*, Figs. S4) was  
208 almost synchronic with intensive admixture, a process that was also characterized by  
209 positive ancestry-based assortative mating (6).

210 ***The African gene pool is more homogenous between-populations in the Americas***  
211 ***than in Africa***

212 Figure 1 suggests that African ancestry clusters are more homogeneously distributed  
213 between admixed American continent populations than between the African populations  
214 that contributed to the Transatlantic Slave Trade. Considering only the African gene  
215 pool, the largest differentiation, measured by the *African-Specific Genetic Distance*  
216 (*ASGD*, Fig. 3 and *SI Appendix*, section 4 and Figs. S5), is observed between African  
217 populations (mean: 0.057, mean excluding populations with marginal contribution to  
218 the Americas [Nilotics and Sandawe: 0.53]), followed by differentiation between  
219 African vs. America's populations (mean: 0.043) and between populations of the  
220 Americas (mean: 0.018, 32% of the *ASGD* between African populations) (Wilcoxon  
221 test,  $p < 10^{-6}$  for the three pairwise comparisons, Fig. 3).

222 To better understand this pattern of *between-populations* homogenization of the African  
223 gene pool in the Americas, and for the geographic regions represented in our dataset for  
224 which there are historical demography records of origin and destination of Africans(1),  
225 we compared: (i) proportions of West-Central Africa-, Western Africa- and South-East  
226 Africa-associated ancestry clusters (Fig. 1) with (ii) expected proportion of these  
227 ancestry clusters, estimated from the proportions of arrivals from different locations  
228 (Fig. 4 ,*SI Appendix*, Table S5, S6 and section 5). Overall, for New World populations  
229 the proportions of South-Eastern African and Western African ancestry clusters are  
230 highly correlated with the expected ancestry based on the numbers of arrivals to  
231 Americas ports and departures from African ports (Spearman rho= 0.89, p = 0.02).  
232 However, for the West-Central African ancestry cluster the correlation does not reach  
233 significance (Fig. 4). For the entire American continent, we observe an excess of the  
234 observed West-Central Africa ancestry clusters (47.7% observed vs. 40% expected,  
235 being this a conservative estimation of the difference, see *SI Appendix*, section 5, p = <  
236 2.2e-16), mainly determined by Southeastern Brazil and the US populations. The  
237 poorest concordance between observed and expected ancestries is observed in  
238 Southeastern Brazil, that presents more of the West-Central African ancestry cluster  
239 (37%) than expected (20%) (p = < 2.2e-16) and complementarily, less of the South/East  
240 African ancestry cluster than expected based on arrivals (55% observed vs. 76%  
241 expected (p < 2.2 x 10<sup>-16</sup>). The US population also shows an excess of the West-Central  
242 African ancestry cluster (54.7% observed vs. 43.1% expected, p < 3.33<sup>-16</sup>), compensated  
243 by a deficit of the Western African ancestry cluster (19.1% observed vs. 27.7%  
244 expected, p < 3.33<sup>-16</sup>). Therefore, the *between-population* homogenization of the African  
245 gene pool in the Americas is partly explained by the excess of the West-Central Africa  
246 ancestry cluster in Southeast Brazil and in the US (Fig. 4). The higher between-

247 population homogeneity of the African gene pool in the Americas contributes to a more  
248 statistical power of genetic association studies involving individuals with African  
249 ancestry from different populations of the Americas.

250 In conclusion, genetic data trace the African genetic roots of admixed individuals of the  
251 Americas to a broad geographic extension (from Western Africa to East Africa),  
252 associated with a high linguistic diversity (Niger Kordofanian non-Bantu and Western-  
253 and Eastern-Bantu language speakers). Considering the level of *between-populations*  
254 genetic differentiation in the African regions of origin of slaves, historical facts that  
255 homogenized the *between-populations* component of genetic diversity have  
256 predominated over facts that tend to maintain or increase it. This latter group of facts  
257 includes geographic (i.e. inter-continental distances and maritime winds/currents) and  
258 geopolitical factors (i.e. specific European colonial influences and possessions and the  
259 abolition of the slavery by British in 1807), that shaped an association of Western  
260 African ancestry with northern latitudes and South/East African ancestry with southern  
261 latitudes. Contrastingly, the following facts have contributed to gene flow between  
262 individuals with different African ancestries and thus, to the *between-populations*  
263 homogenization of the African gene pool in the Americas: (i) despite their specific  
264 European origins, traders/vessels transported slaves, frequently illegally, to different  
265 American continent ports (1, 18, 21); (ii) *forced amalgamation*, which is the preference  
266 of slave owners for slaves from different geographic and linguistic origins, so that they  
267 could not understand each other, and thus, reducing the risk of riots (22); and (iii) the  
268 role of islands such as Jamaica and Barbados, that centralized parts of arrivals of  
269 African slaves, and re-distributed them to different parts of the Americas (2). Moreover,  
270 the *between-population* homogenization of the African gene pool in the Americas is  
271 partly explained by the excess of the West-Central Africa ancestry cluster (the most

272 prevalent in the Americas) in US and Southeast Brazil respect to demographic  
273 expectations, which suggest a spread of this ancestry in the American continent.  
274 Interestingly, in most of the Americas, the arrival of the largest contingent of Africans  
275 between 1,700 and 1,850 was almost synchronic with the intensification of admixture,  
276 which implies that this time interval was critical to shape the structure of the African  
277 gene pool in the New World. This study contributes with a population genetics  
278 perspective to the ongoing social, cultural and political debate regarding ancestry, race,  
279 and admixture in the Americas (23, 24).

280

## 281 **Methods**

282 We analyzed a dataset including 6,267 unrelated individuals with more than 10% of  
283 African ancestry for 533,242 SNPs (*SI Appendix*, Table S1). We inferred population  
284 structure and admixture using ADMIXTURE (12) and Principal Component Analysis  
285 (25) for unlinked SNPs and ChromoPainter and fineSTRUCTURE (13) for haplotype-  
286 based analyses. Admixture dynamics was inferred using GLOBETROTTER (14).  
287 Demographic information of embarked and disembarked African slaves was obtained the  
288 African Voyages database (<http://www.slavevoyages.org/voyage/search>). Genetic  
289 differentiation between populations considering only the African gene pool was estimated  
290 using the *African-ancestry genetic distance* (AAGD, *SI Appendix*, section 4.1).  
291 Flowcharts and masterscripts of the analyses are available in the EPIGEN Scientific  
292 Workflow (26) web (<http://ldgh.com.br/scientificworkflow>). Details of Methods are in  
293 the *SI Appendix*.

294

295 Data Availability: EPIGEN-Brazil data are deposited in the European Nucleotide  
296 Archive (PRJEB9080 (ERP010139), accession no. EGAS00001001245, under EPIGEN

297 Committee Controlled Access mode. The Nilotics and Kwa/Gur datasets are deposited  
298 in dbGaP at phs001705.v1.p1 and phs000838.v1.p1, respectively. The Botswana and  
299 Tanzania datasets from Sarah Tishkoff Lab are available at dbGaP accession number  
300 phs001396.v1.p1 and SRA BioProject PRJNA392485.

301

## 302 **Acknowledgments**

303 We thank Sergio D Pena, Marcia Beltrame, Rosangela Loschi, Eduardo F Paiva,  
304 Fabrício Santos, Renan Souza, Claudio Struchiner, Ricardo Santos and Garrett  
305 Hellenthal for advice, discussions and criticisms. **Funding:** The EPIGEN-Brazil  
306 Initiative is funded by the Brazilian Ministry of Health (Department of Science and  
307 Technology from the Secretaria de Ciência, Tecnologia e Insumos Estratégicos) through  
308 Financiadora de Estudos e Projetos. The EPIGEN-Brazil investigators received funding  
309 from the Brazilian Ministry of Education (CAPES Agency). ETS, MHG, VB, TPL and  
310 MFLC were supported by Brazilian National Research Council (CNPq), Minas Gerais  
311 Research Agency (FAPEMIG) and Pró-Reitoria de Pesquisa da Universidade Federal de  
312 Minas Gerais. MHG performed part of this study as CAPES-PDSE fellow, VB was a  
313 CAPES-PEC-PG fellow. MLS was a TWAS-CNPq PhD fellow. Tishkoff laboratory is  
314 funded by the National Institutes of Health (1R01DK104339-0 and 1R01GM113657-  
315 01). EMBLEM is funded by the Intramural Research Program of the Division of Cancer  
316 Epidemiology and Genetics, National Cancer Institute (NCI) (HHSN261201100063C  
317 and HHSN261201100007I) and, in part, by the Intramural Research Program, National  
318 Institute of Allergy and Infectious Diseases (SJR), National Institutes of Health,  
319 Department of Health and Human Services. Bioinformatics support was provided by the  
320 Sagarana HPC cluster, CPAD-ICB-UFMG, Brazil. **Author contributions:** The project  
321 was conceived by MHG and ETS. MHG assembled datasets. MHG, VB, TPL, RGM,

322 MMA, GSA, NMA, FSGK, MM, WCSM, LAM, MRR, HPSA, MLS, MOS, GSS, CZ  
323 analyzed genetic data. RL and RZ performed laboratory experiments. ETS supervised  
324 bioinformatic and statistical analyses. MD, RHG, HG, ACP, MFLC, MLB, BLH, SMM,  
325 SJC, SAT and MY contributed with data. MHG, VB, AWB, MY, SAT contributed to  
326 data interpretation. MHG, VB and ETS wrote the manuscript. All authors read the  
327 manuscripts and contributed with suggestions. **Competing interests:** The authors  
328 declare no competing interests.

329

### 330 **References**

- 331 1. Eltis D (2008) A brief overview of the Trans-Atlantic Slave Trade. *Voyages: The*  
332 *Trans-Atlantic Slave Trade Database*: <http://www.slavevoyages.org>. Available at:  
333 [http://www.redemaosdadas.org/wp-content/uploads/2014/02/HIST211-1.3.3-](http://www.redemaosdadas.org/wp-content/uploads/2014/02/HIST211-1.3.3-TransAtlanticSlaveTrade.pdf)  
334 *TransAtlanticSlaveTrade.pdf*.
- 335 2. Thomas H (1999) *The Slave Trade: The Story of the Atlantic Slave Trade: 1440 -*  
336 *1870* (Simon and Schuster).
- 337 3. Baharian S, et al. (2016) The Great Migration and African-American Genomic  
338 Diversity. *PLoS Genet* 12(5):e1006059.
- 339 4. Bryc K, et al. (2010) Genome-wide patterns of population structure and admixture  
340 in West Africans and African Americans. *Proc Natl Acad Sci U S A* 107(2):786–  
341 791.
- 342 5. Campbell MC, Hirbo JB, Townsend JP, Tishkoff SA (2014) The peopling of the  
343 African continent and the diaspora into the new world. *Curr Opin Genet Dev*  
344 29:120–132.
- 345 6. Kehdy FSG, et al. (2015) Origin and dynamics of admixture in Brazilians and its  
346 effect on the pattern of deleterious mutations. *Proc Natl Acad Sci U S A*  
347 112(28):8696–8701.
- 348 7. Mathias RA, et al. (2016) A continuum of admixture in the Western Hemisphere  
349 revealed by the African Diaspora genome. *Nat Commun* 7:12522.
- 350 8. Rotimi CN, Tekola-Ayele F, Baker JL, Shriner D (2016) The African diaspora:  
351 history, adaptation and health. *Curr Opin Genet Dev* 41:77–84.
- 352 9. Salzano FM, Bortolini MC (2001) *The Evolution and Genetics of Latin American*  
353 *Populations by Francisco M. Salzano* (Cambridge University Press).

- 354 10. Tishkoff SA, et al. (2009) The genetic structure and history of Africans and  
355 African Americans. *Science* 324(5930):1035–1044.
- 356 11. Moreno-Estrada A, et al. (2013) Reconstructing the population genetic history of  
357 the Caribbean. *PLoS Genet* 9(11):e1003925.
- 358 12. Alexander DH, Novembre J, Lange K (2009) Fast model-based estimation of  
359 ancestry in unrelated individuals. *Genome Res* 19(9):1655–1664.
- 360 13. Lawson DJ, Hellenthal G, Myers S, Falush D (2012) Inference of population  
361 structure using dense haplotype data. *PLoS Genet* 8(1):e1002453.
- 362 14. Hellenthal G, et al. (2014) A genetic atlas of human admixture history. *Science*  
363 343(6172):747–751.
- 364 15. Busby GB, et al. (2016) Admixture into and within sub-Saharan Africa. *Elife* 5.  
365 doi:10.7554/eLife.15266.
- 366 16. Patin E, et al. (2017) Dispersals and genetic adaptation of Bantu-speaking  
367 populations in Africa and North America. *Science* 356(6337):543–546.
- 368 17. Domingues da Silva DB (2008) The Atlantic Slave Trade to Maranhão, 1680–  
369 1846: Volume, Routes and Organisation. *Slavery Abol* 29(4):477–501.
- 370 18. Klein HS (1987) A demografia do tráfico atlântico de escravos para o Brasil. *Estud*  
371 *Econ* 17(2):129–149.
- 372 19. Coelho M, Sequeira F, Luiselli D, Beleza S, Rocha J (2009) On the edge of Bantu  
373 expansions: mtDNA, Y chromosome and lactase persistence genetic variation in  
374 southwestern Angola. *BMC Evol Biol* 9:80.
- 375 20. Versiani FR D. João VI e a (não) abolição do tráfico de escravos para o Brasil.  
376 *Trabalho Apresentado Na Seção “ Políticas Joaninas ” Do IX Congresso Da*  
377 *BRASA-Brazilian Studies Association. New Orleans*, pp 27–29.
- 378 21. Klein HS (2010) *The Atlantic Slave Trade* (Cambridge University Press).
- 379 22. Olcott C (1838) *Two Lectures on the Subjects of Slavery and Abolition* (author).
- 380 23. Clinton WJ (2001) Erasing America’s Color Lines. *The New York Times*. Available  
381 at: [https://www.nytimes.com/2001/01/14/opinion/erasing-america-s-color-](https://www.nytimes.com/2001/01/14/opinion/erasing-america-s-color-lines.html)  
382 [lines.html](https://www.nytimes.com/2001/01/14/opinion/erasing-america-s-color-lines.html) [Accessed April 10, 2019].
- 383 24. Duke University Press - Mestizo Genomics Available at:  
384 <https://www.dukeupress.edu/mestizo-genomics> [Accessed April 10, 2019].
- 385 25. Price AL, et al. (2006) Principal components analysis corrects for stratification in  
386 genome-wide association studies. *Nat Genet* 38(8):904–909.
- 387 26. Magalhães WCS, et al. (2018) EPIGEN-Brazil Initiative resources: a Latin  
388 American imputation panel and the Scientific Workflow. *Genome Res* 28(7):1090–  
389 1095.



- 390 27. Gouveia MH, et al. (2019) Genetic signatures of gene flow and malaria-driven  
391 natural selection in sub-Saharan populations of the “endemic Burkitt Lymphoma  
392 belt.” *PLoS Genet* 15(3):e1008027.

393

394 **Figures and Legends:**

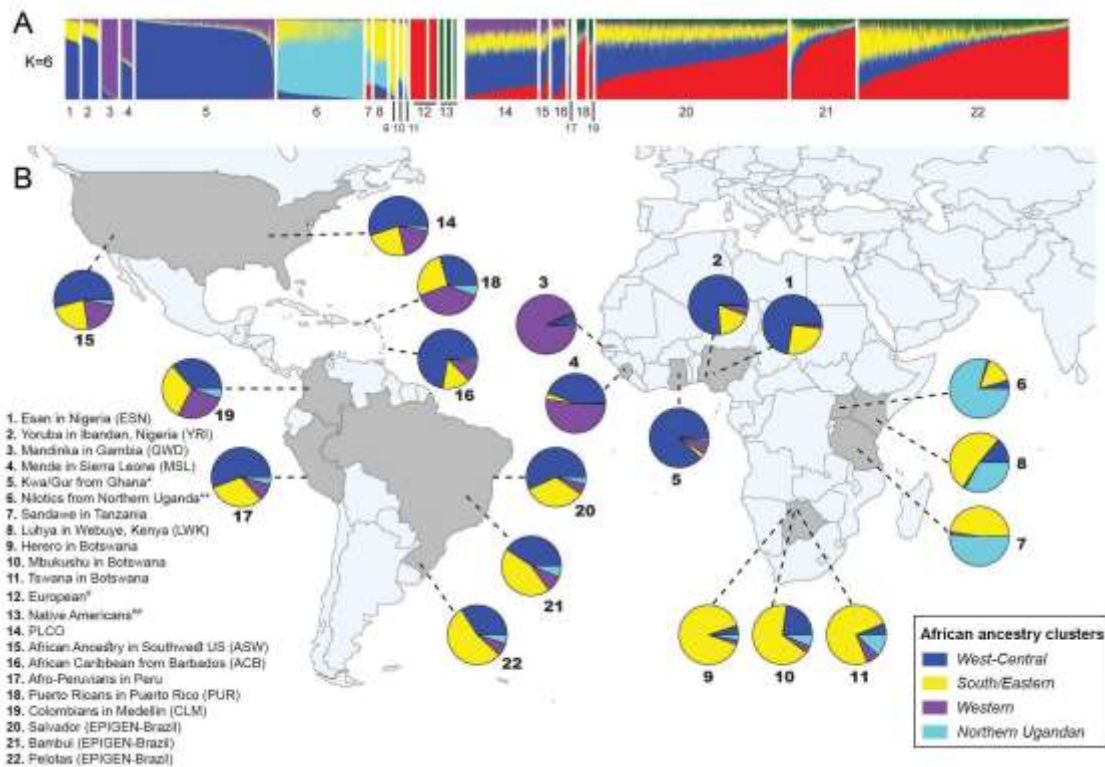

395

396 **Fig. 1. Ancestry analysis of African and admixed populations of the Americas**

397 **inferred using ADMIXTURE (K=6).** (A) Vertical bar plot showing the total African,

398 European and Native American proportions of the ancestry clusters (*SI Appendix*, Fig.

399 S1 and section 2.6.1.). \*The Kwa/Gur dataset includes approximately 35 ethno-

400 linguistic groups, predominantly from the Kwa and Gur Niger-Congo linguistic

401 group(27). \*\*The Nilotics dataset includes predominantly three ethno-linguistic groups

402 in Northern Uganda (Langi, Acholi and Lugbara) from the Nilotic linguistic group<sup>27</sup>;

403 #the Europeans are: Iberian Population in Spain (IBS) and Utah residents with Northern

404 and Western European ancestry (CEU), in this order in the ADMIXTURE bar plot;

405 ##the Native Americans are: Shima, Ashaninka and Aymara, respectively from Borda

406 et al. (in preparation); the PLCO (Prostate, Lung, Colorectal and Ovarian Cancer

407 Screening) data is comprised of African-Americans from East USA. (B) Percentages of

408 subcontinental African ancestry clusters. For admixed populations of the American

409 continent these percentages are relative to the total African ancestry (i.e. the sum of the  
410 four African associated clusters: West-Central, Western, Southern/Eastern, Northern  
411 Ugandan).

412

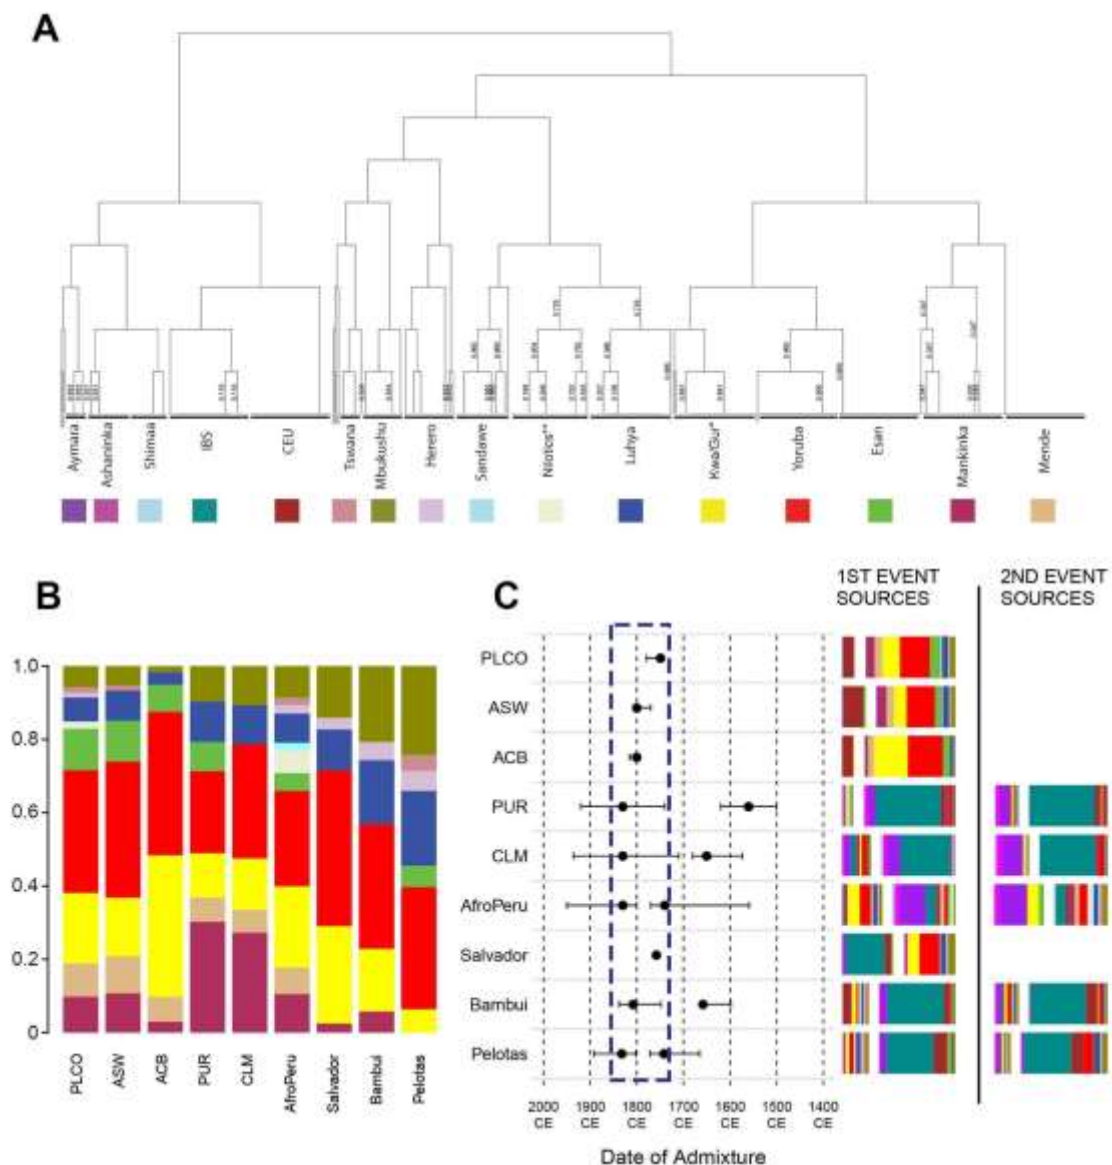

413

414 **Fig. 2. Haplotype-based clustering of parental individuals and admixture**

415 **inferences for admixed American continent populations. (A) fineSTRUCTURE tree**

416 **of parental individuals. \*The Kwa/Gur dataset includes approximately 35 ethno-**

417 **linguistic groups, predominantly from the Kwa and Gur linguistic group<sup>27</sup>. \*\*The**

418 **Nilotics dataset includes predominantly three ethno-linguistic groups from Northern**

419 **Uganda (Langi, Acholi and Lugbara) of the Nilotic linguistic group<sup>27</sup>. (B)**

420 **Subcontinental contributions relative to the total African ancestry in admixed**

421 **populations inferred by the MIXTURE MODEL. (C) GLOBETROTTER inference of**

422 admixture events for each admixed population. Inferred date(s) and 95% confidence  
423 intervals are represented by dots and horizontal lines in the graph, respectively. Dashed  
424 rectangle in the admixture dates plots highlights the most dynamic period for admixture.  
425 Beside the dating graph, we represented the inferred admixing sources (bars) for one  
426 and two events. Bar size represents the genetic contribution of the source. Each color  
427 corresponds to the contribution of each parental population. CEU=Utah Residents  
428 (CEPH) with Northern and Western Ancestry-USA, IBS=Iberian population in Spain,  
429 CLM=Colombians from Medellin, PUR=Puerto Ricans from Puerto Rico,  
430 ACB=African Caribbeans in Barbados, ASW= African Americans in Southwest USA,  
431 PLCO= African Americans from East USA.  
432

433

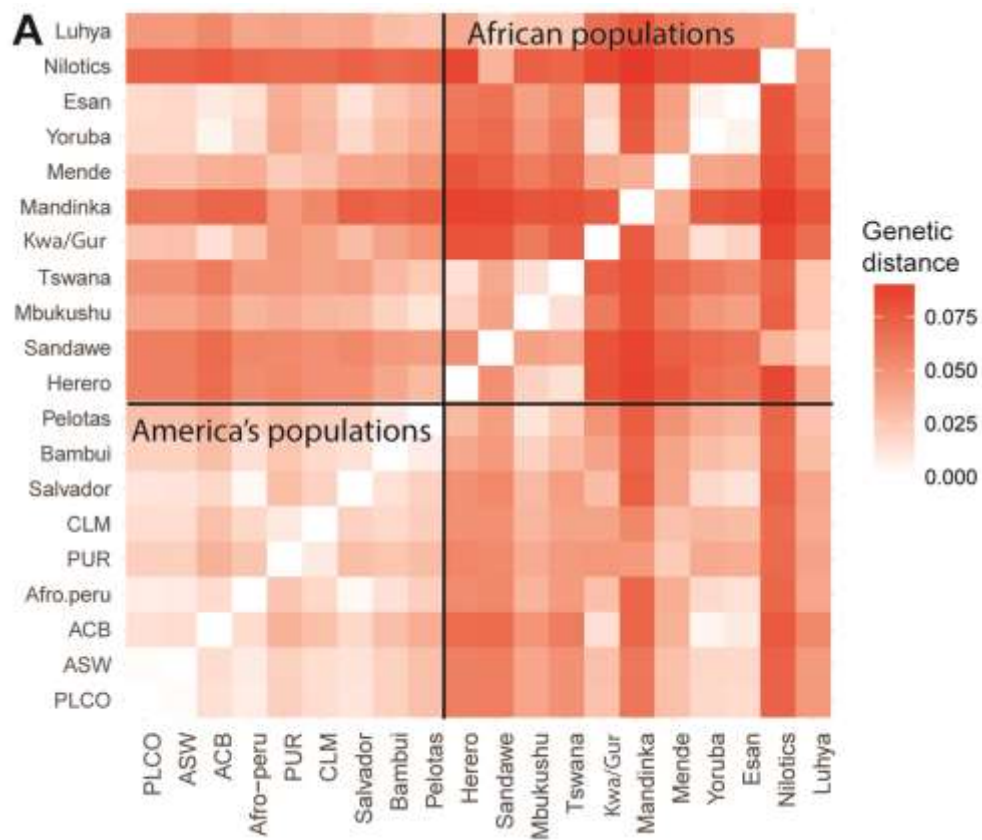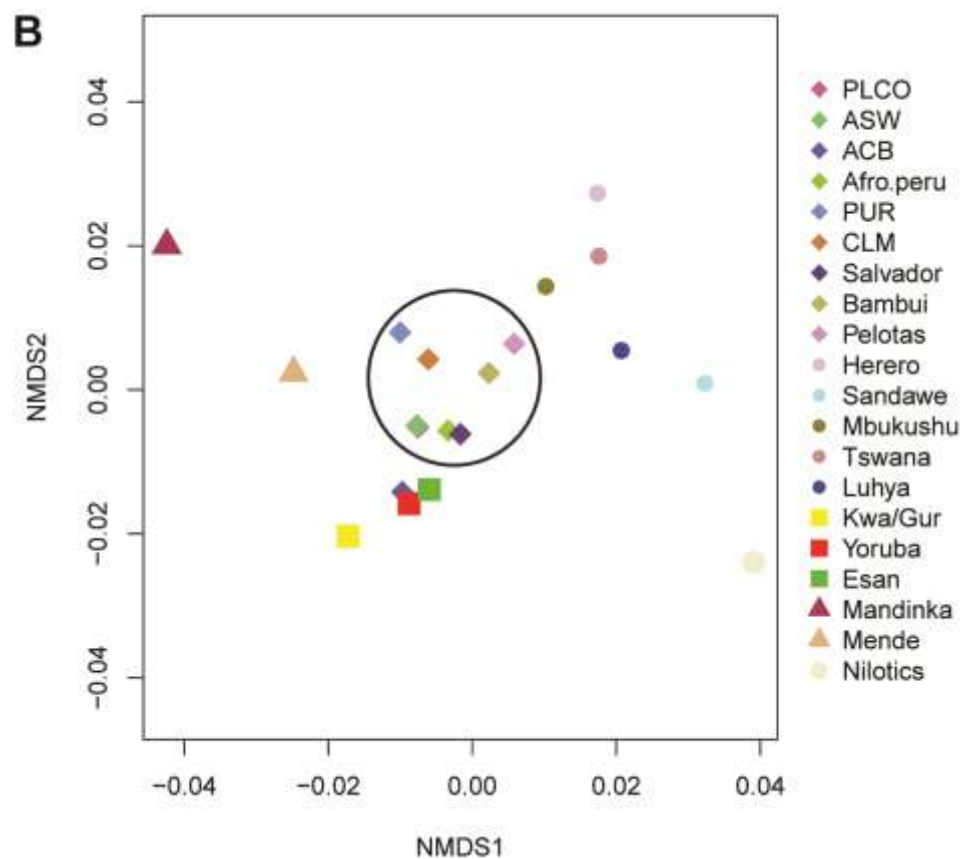

434

435 **Fig. 3. Pairwise genetic distances of the African gene pool between populations of**  
436 **the American continent and Africa.** (A) Heatmap Matrix and (B) Multidimensional  
437 scaling of the African gene pool genetic distances. We used solid squares, triangles and  
438 circles to represent populations associate with WCA: West-Central Africa, SEA:  
439 South/East Africa and WA: Western Africa ancestry clusters. The admixed American  
440 continent populations are highlighted with the circle with the exception of the ACB  
441 population which clustered closer to the WCA ancestry-associated populations.  
442 CLM=Colombians from Medellin, PUR=Puerto Ricans from Puerto Rico,  
443 ACB=African Caribbeans in Barbados, ASW= Americans of African ancestry in South  
444 western USA, PLCO= African-Americans from Eastern USA.  
445

446

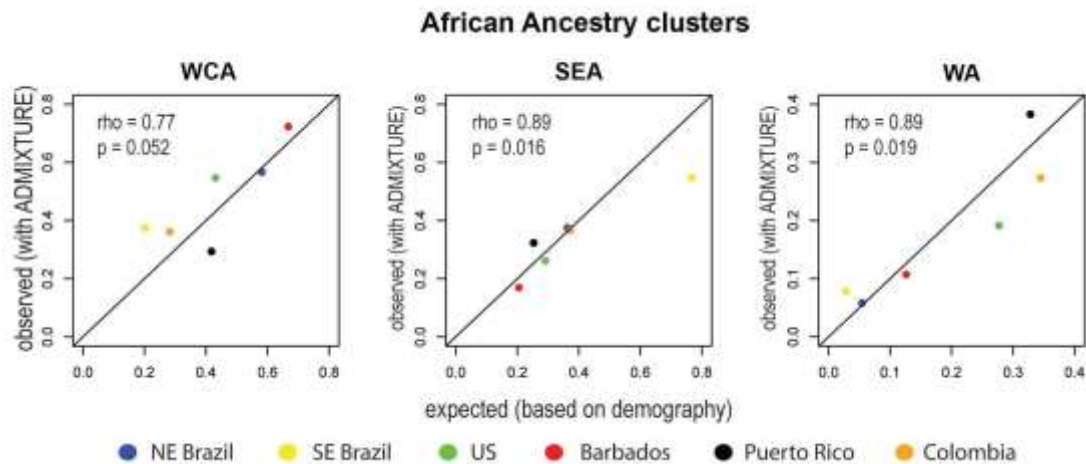

447

448 **Fig. 4. Observed and expected proportions of genomic African ancestry clusters in**  
449 **the Americas.** We compared (i) the observed proportions of genomic African ancestry  
450 clusters (inferred using ADMIXTURE [Alexander et al. 2009]) in the vertical axis, with  
451 (ii) expected proportions of genomic African ancestry clusters, estimated based on  
452 demographic historical records from the African Voyages Database<sup>1</sup>, in the horizontal  
453 axis (see *SI Appendix* and Table S3 for details). rho: Spearman's coefficients of  
454 correlation, p: significances. The significance was evaluated using randomization tests  
455 of 10,000 replications. WCA: West-Central Africa, SEA: South/East Africa, WA:  
456 Western Africa.

457
